# Supplementary material for: Synergistic effects of silver ions and metformin against enterococcus faecalis under high-glucose conditions in vitro
Source: PubMed Central journal article supplement (PMC8482635; doi:10.1186/s12866-021-02291-2), 2021-09-29
Supplement: 12866_2021_2291_MOESM1_ESM.pdf [file 12866_2021_2291_MOESM1_ESM.pdf]

**Synergistic effects of silver ions and metformin against *Enterococcus faecalis*  
under high-glucose conditions *in vitro***

Xuying Wu<sup>a</sup>, Wei Fan<sup>a,b</sup>, Bing Fan<sup>a,b</sup>

<sup>a</sup>: The State Key Laboratory Breeding Base of Basic Science of Stomatology (Hubei-MOST) and Key Laboratory of Oral Biomedicine Ministry of Education, School and Hospital of Stomatology, Wuhan University, Wuhan, People's Republic of China

<sup>b</sup>: Corresponding authors: Wei Fan (weifan@whu.edu.cn) & Bing Fan (bingfan@whu.edu.cn)

### Supplementary Information

**Table S1.** Data of dynamic growth curve test were shown as mean OD<sub>600</sub> and Standard Error of Means (SEM), which was plotted in Figure 1.

|      |        | 2h    |       | 4h    |       | 6h    |       | 8h    |       | 10h   |       |
|------|--------|-------|-------|-------|-------|-------|-------|-------|-------|-------|-------|
|      |        | Mean  | SEM   | Mean  | SEM   | Mean  | SEM   | Mean  | SEM   | Mean  | SEM   |
| BHI  | Ag     | 0.145 | 0.003 | 0.154 | 0.002 | 0.186 | 0.004 | 0.394 | 0.029 | 0.769 | 0.013 |
|      | Met3.2 | 0.369 | 0.009 | 0.582 | 0.007 | 0.606 | 0.010 | 0.605 | 0.010 | 0.618 | 0.011 |
|      | Met6.4 | 0.203 | 0.006 | 0.407 | 0.005 | 0.491 | 0.006 | 0.482 | 0.005 | 0.497 | 0.007 |
|      | AM3.2  | 0.139 | 0.005 | 0.137 | 0.006 | 0.139 | 0.005 | 0.138 | 0.006 | 0.140 | 0.004 |
|      | AM6.4  | 0.114 | 0.002 | 0.111 | 0.001 | 0.111 | 0.001 | 0.119 | 0.005 | 0.114 | 0.002 |
|      | BHI    | 0.481 | 0.008 | 0.652 | 0.009 | 0.665 | 0.009 | 0.665 | 0.006 | 0.669 | 0.005 |
| BHIG | Ag     | 0.179 | 0.003 | 0.214 | 0.020 | 0.650 | 0.019 | 0.767 | 0.012 | 0.756 | 0.010 |
|      | Met3.2 | 0.308 | 0.022 | 0.616 | 0.006 | 0.664 | 0.004 | 0.651 | 0.009 | 0.634 | 0.017 |
|      | Met6.4 | 0.191 | 0.009 | 0.401 | 0.016 | 0.516 | 0.019 | 0.560 | 0.017 | 0.556 | 0.012 |
|      | AM3.2  | 0.155 | 0.006 | 0.142 | 0.002 | 0.139 | 0.001 | 0.138 | 0.001 | 0.141 | 0.002 |
|      | AM6.4  | 0.147 | 0.005 | 0.140 | 0.003 | 0.136 | 0.003 | 0.133 | 0.002 | 0.134 | 0.002 |
|      | BHIG   | 0.449 | 0.027 | 0.653 | 0.005 | 0.677 | 0.014 | 0.664 | 0.010 | 0.662 | 0.011 |

**Table S2.** Data of colony-forming units (CFU)-counting test were shown as mean counting and SEM, which was plotted in Figure 2.

|        | BHI                |                    | BHIG               |                    |
|--------|--------------------|--------------------|--------------------|--------------------|
|        | Mean               | SEM                | Mean               | SEM                |
| CON    | $1.48 \times 10^9$ | $0.12 \times 10^9$ | $8.90 \times 10^8$ | $0.52 \times 10^8$ |
| Ag     | $1.71 \times 10^9$ | $0.12 \times 10^9$ | $1.16 \times 10^9$ | $0.08 \times 10^9$ |
| Met3.2 | $1.18 \times 10^9$ | $0.07 \times 10^9$ | $7.63 \times 10^8$ | $0.56 \times 10^8$ |
| Met6.4 | $6.53 \times 10^8$ | $0.71 \times 10^8$ | $4.72 \times 10^8$ | $0.78 \times 10^8$ |
| AM3.2  | 0                  | 0                  | $1.42 \times 10^5$ | $0.24 \times 10^5$ |
| AM6.4  | 0                  | 0                  | 0                  | 0                  |
| CHX    | 0                  | 0                  | 0                  | 0                  |

**Table S3.** Data of biofilm test on dentin slices were shown as mean OD<sub>600</sub> and SEM, which was plotted in Figure 3.

|      | 2h     |       | 4h    |       | 6h    |       | 8h    |       | 10h   |       |       |
|------|--------|-------|-------|-------|-------|-------|-------|-------|-------|-------|-------|
|      | Mean   | SEM   | Mean  | SEM   | Mean  | SEM   | Mean  | SEM   | Mean  | SEM   |       |
| BHI  | BHI    | 0.068 | 0.001 | 0.080 | 0.002 | 0.213 | 0.019 | 0.574 | 0.016 | 0.755 | 0.025 |
|      | Ag     | 0.067 | 0.000 | 0.068 | 0.000 | 0.071 | 0.002 | 0.079 | 0.004 | 0.214 | 0.059 |
|      | Met6.4 | 0.067 | 0.001 | 0.069 | 0.001 | 0.084 | 0.005 | 0.247 | 0.053 | 0.590 | 0.013 |
|      | AM3.2  | 0.066 | 0.000 | 0.067 | 0.000 | 0.068 | 0.000 | 0.068 | 0.000 | 0.091 | 0.004 |
|      | AM6.4  | 0.066 | 0.001 | 0.068 | 0.000 | 0.068 | 0.000 | 0.068 | 0.001 | 0.079 | 0.003 |
|      | CHX    | 0.065 | 0.000 | 0.067 | 0.001 | 0.070 | 0.003 | 0.078 | 0.007 | 0.080 | 0.008 |
| BHIG | BHIG   | 0.071 | 0.001 | 0.092 | 0.003 | 0.328 | 0.021 | 0.707 | 0.014 | 0.780 | 0.021 |
|      | Ag     | 0.066 | 0.001 | 0.068 | 0.001 | 0.082 | 0.002 | 0.217 | 0.021 | 0.703 | 0.020 |
|      | Met6.4 | 0.069 | 0.001 | 0.085 | 0.002 | 0.229 | 0.022 | 0.601 | 0.013 | 0.701 | 0.021 |
|      | AM3.2  | 0.065 | 0.000 | 0.068 | 0.001 | 0.070 | 0.001 | 0.099 | 0.010 | 0.368 | 0.075 |
|      | AM6.4  | 0.066 | 0.000 | 0.066 | 0.000 | 0.067 | 0.000 | 0.070 | 0.001 | 0.089 | 0.007 |
|      | CHX    | 0.059 | 0.004 | 0.057 | 0.005 | 0.060 | 0.005 | 0.060 | 0.005 | 0.060 | 0.005 |

**Table S4.** Data of cytotoxicity assays were shown as mean OD<sub>450</sub> and SEM, which was plotted in Figure 4.

|      | Ag    | Met3.2 | Met6.4 | AM3.2 | AM6.4 | CON   | BKG   | CHX   |
|------|-------|--------|--------|-------|-------|-------|-------|-------|
| Mean | 0.781 | 0.777  | 0.775  | 0.803 | 0.675 | 0.742 | 0.244 | 0.287 |
| SEM  | 0.030 | 0.014  | 0.031  | 0.020 | 0.024 | 0.005 | 0.023 | 0.019 |
